1  
2  
3  
4  
5  
6  
7  
8  
9  
10  
11  
12  
13  
14  
15  
16  
17  
18  
19  
20  
21  
22  
23

## Catch me if you can:

### Least myelinated white matter develops fastest during early infancy

Mareike Grotheer<sup>1,2,3\*</sup>, Mona Rosenke<sup>3</sup>, Hua Wu<sup>4</sup>, Holly Kular<sup>3</sup>, Francesca R. Querdati<sup>3</sup>, Vaidehi Natu<sup>3</sup>, Jason D. Yeatman<sup>3,5,6,7</sup>, and Kalanit Grill-Spector<sup>3,5</sup>

<sup>1</sup> Department of Psychology, Philipps-Universität Marburg, Marburg 35039, Germany.

<sup>2</sup> Center for Mind, Brain and Behavior – CMBB, Philipps-Universität Marburg and Justus-Liebig-Universität Giessen, Marburg 35039, Germany.

<sup>3</sup>Psychology Department, Stanford University, Stanford, CA 94305, USA.

<sup>4</sup>Cognitive and Neurobiological Imaging Center (CNI), Stanford University, Stanford, CA 94305, USA.

<sup>5</sup>Wu Tsai Neurosciences Institute, Stanford University, CA 94305, USA.

<sup>6</sup>Graduate School of Education, Stanford University, Stanford, CA 94305, USA.

<sup>7</sup>Division of Developmental-Behavioral Pediatrics, Stanford University School of Medicine, Stanford, CA 94305, USA.

\*=corresponding author

24           **Development of myelin, a fatty sheath that insulates nerve fibers, is critical for brain**  
25 **function. Myelination during infancy has been studied in postmortem histology, but such**  
26 **data cannot evaluate the developmental trajectory of the white matter bundles of the brain.**  
27 **To address this gap in knowledge, we (i) obtained longitudinal diffusion MRI measures and**  
28 **quantitative MRI measures of  $T_1$ , which is sensitive to myelin, from newborns to 6-months-**  
29 **old infants, and (ii) developed an automated fiber quantification method that identifies**  
30 **bundles from dMRI and quantifies their  $T_1$  development in infants. Here we show that both**  
31 **along the length of each bundle and across bundles,  $T_1$  decreases from newborns to 6 months-**  
32 **old's and the rate of  $T_1$  decrease is inversely correlated with  $T_1$  at birth. As lower  $T_1$  indicates**  
33 **more myelin, these data suggest that in early infancy white matter bundles myelinate at**  
34 **different rates such that less mature bundles at birth develop faster to catch-up with the other**  
35 **bundles. We hypothesize that this development reflects experience-dependent myelination,**  
36 **which may promote efficient and coordinated neural communication. These findings open**  
37 **new avenues to measure typical and atypical white matter development in early infancy,**  
38 **which has important implications for early identification of neurodevelopmental disorders.**

39

40

41

42

43

44

45

46

47 Myelin, the fatty sheath that insulates axons that connect different brain regions is essential  
48 for brain function, as it enables rapid and synchronized neural communication across the brain. The  
49 formation of myelin, or myelination, is a key hallmark of brain development during infancy, and  
50 abnormalities in myelination are linked to a plethora of developmental and cognitive disorders<sup>1</sup>. Classic  
51 post-mortem histology reported heterogeneous myelination during infancy<sup>2-5</sup>. However, histological  
52 studies compare postmortem brain samples across individuals, often include pathologies, and use  
53 observer-dependent methods<sup>6</sup>. Thus, classic histology provides a cross-sectional and qualitative  
54 glimpse of myelination. While the heterogenous pattern of development has been replicated<sup>7,8</sup> with  
55 modern quantitative MRI (qMRI)<sup>8,16,17</sup>, how and at what rate myelin develops in white matter bundles  
56 during infancy is unknown.

57 Prior data suggest two hypotheses of myelination in infancy. The starts-first/finishes-first  
58 hypothesis proposes that postnatal myelination follows prenatal patterns<sup>2,3,5</sup>, predicting that bundles  
59 that are more myelinated at birth will develop faster postnatally and finish myelinating earlier  
60 (**Supplementary Data 1**). This may allow for most important brain functions to mature faster.  
61 Alternatively, the catch-up hypothesis<sup>7,12</sup> suggests that white matter tracts that are less myelinated at  
62 birth will develop faster postnatally (**Supplementary Data 1**). This development may be experience-  
63 dependent<sup>13-16</sup> and allow for more efficient and coordinated signal transmission across the entire brain.

64 Distinguishing between these hypotheses requires *in-vivo* measurements of the typical,  
65 longitudinal developmental of myelin in individual infants and across bundles. While we cannot  
66 measure myelin directly *in-vivo*, qMRI enables the measurement of proton relaxation time ( $T_1$  [s]).  
67 Notably, 90% of the variance of  $T_1$  in the white matter is driven by myelin<sup>17</sup>, whereby higher myelin  
68 content results in lower  $T_1$ . Thus, we predict that (i) bundles that are more myelinated at birth, will  
69 have lower  $T_1$  in newborns than less myelinated bundles, (ii) if myelin increases from 0 to 6 months,  
70 then  $T_1$  will decrease from 0 to 6 months, and (iii) if  $T_1$  development follows the starts-first/finishes-  
71 first hypothesis  $T_1$  will decrease faster in bundles with lower  $T_1$  at birth, but if  $T_1$  development follows  
72 the catch-up hypothesis  $T_1$  will decrease faster in bundles with higher  $T_1$  at birth.

73 To test these predictions, we acquired longitudinal measurements of anatomical MRI,  
74 diffusion MRI (dMRI), and qMRI in infants during natural sleep at 3 timepoints: newborn (N=9; age:  
75 8-37 days), 3 months (N=10; age: 79-106 days), and 6 months (N=10; age: 167-195 days) of age.

76

## 77 Results

### 78 New method for automated fiber quantification in infants

79 Evaluating the relationship between myelination at birth and its development across bundles  
80 necessitates identifying each individual infant's bundles in their native brain space in a systematic and  
81 automated way. A major challenge is that tools developed for adults may not be suitable for infants  
82 due to substantial differences in brain size<sup>18</sup> and organization<sup>19</sup>. Thus, we developed a new pipeline for  
83 analyzing infant dMRI data and a novel method, baby automated fiber quantification (babyAFQ), for  
84 automatically identifying 24 bundles (11 in each hemisphere and 2 between-hemispheres) in each  
85 individual infant's brain and timepoint (**Supplementary Data 2-5**). We optimized babyAFQ for  
86 infants by: (i) generating waypoints (anatomical ROIs for defining bundles) on a newborn brain  
87 template (University of North Carolina (UNC) neonatal template<sup>20</sup>), (ii) decreasing the spatial extent  
88 of waypoints compared to adult standard<sup>21</sup> to fit the more compact infant brain, and (iii) adding  
89 additional waypoints to better define curved bundles.

90 BabyAFQ successfully identifies 24 bundles in each infant and timepoint (example infant: **Fig.**  
91 **1**, all infants: **Supplementary Data 5**), including bundles that have not previously been identified in  
92 infants: the posterior arcuate fasciculus<sup>22</sup>, vertical occipital fasciculus<sup>22-24</sup>, and middle longitudinal  
93 fasciculus<sup>25</sup>. The 24 bundles have the expected shape and location in all infants even as their brains  
94 grow from 0 to 6 months. 3D interactive visualizations at 0 months  
95 ([http://vpnl.stanford.edu/babyAFQ/bb11\\_mri0\\_interactive.html](http://vpnl.stanford.edu/babyAFQ/bb11_mri0_interactive.html)), 3 months  
96 ([http://vpnl.stanford.edu/babyAFQ/bb11\\_mri3\\_interactive.html](http://vpnl.stanford.edu/babyAFQ/bb11_mri3_interactive.html)) and 6 months of age

97 ([http://vpnl.stanford.edu/babyAFQ/bb11\\_mri6\\_interactive.html](http://vpnl.stanford.edu/babyAFQ/bb11_mri6_interactive.html)) show the 3D structure of bundles  
 98 in an example infant.

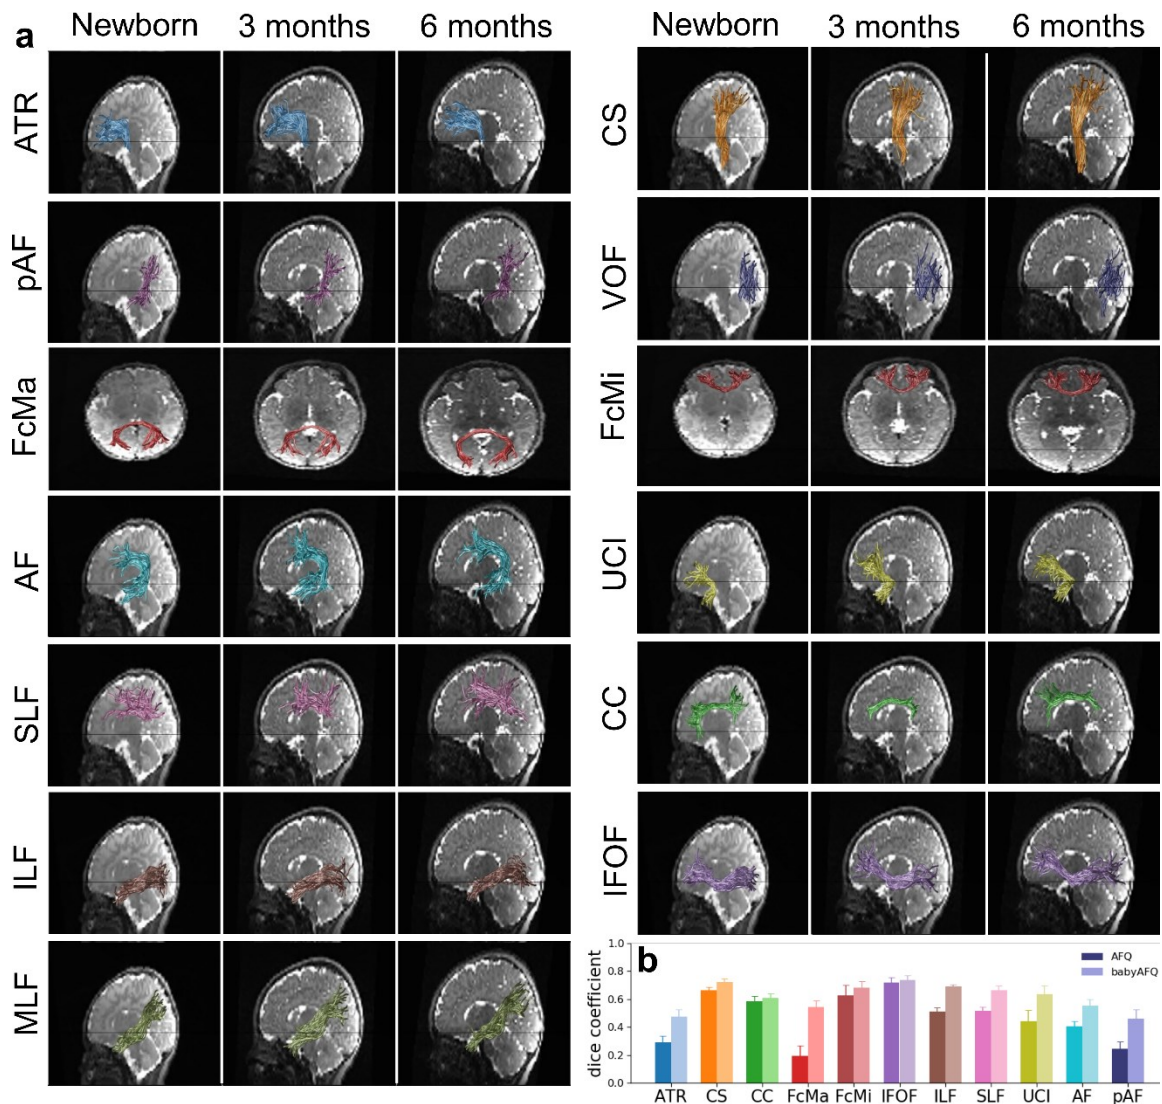

**Figure 1. Baby automated fiber quantification (babyAFQ) identifies white matter bundles in individual infant brains across the first 6 months of life.** 24 bundles (11 in each hemisphere and 2 cross-hemispheric) were successfully identified in all individuals and ages (**Supplementary Data 3-5**). **a.** All bundles of an individual baby. Each row is a bundle, each column is a timepoint; *left*: newborn, *middle*: 3 months, *right*: 6 months. **b.** Comparison of AFQ and babyAFQ performances in identifying each bundle in newborns relative to manually defined (gold-standard) bundles. The dice coefficient quantifies the overlap between the automatically and manually defined bundles, revealing significantly higher performance for babyAFQ than AFQ. *Abbreviations:* ATR: anterior thalamic radiation, CS: cortico-spinal tract, pAF: posterior arcuate fasciculus, VOF: vertical occipital fasciculus, FcMa: forceps major; FcMi: forceps minor, AF: arcuate fasciculus, UCI: uncinate fasciculus, SLF: superior longitudinal fasciculus, CC: cingulum cingulate, ILF: inferior longitudinal fasciculus, IFOF: inferior frontal occipital fasciculus, MLF: middle longitudinal fasciculus.

99 For quality assurance, we compared babyAFQ and AFQ<sup>26</sup> (developed in adults and used in  
100 prior infant studies<sup>27–29</sup>) to manually identified bundles (“gold-standard”). In newborns, bundles  
101 identified by babyAFQ substantially overlapped the gold-standard (mean dice coefficient $\pm$ standard  
102 error (SE):  $0.61\pm 0.02$ ) and this overlap was significantly higher compared to AFQ (**Fig 1b**; **Fig.**  
103 **Supplementary Data 3,5**; 2-way repeated measure analysis of variance (rmANOVA) with AFQ-type  
104 and bundle as factors: AFQ-type:  $F(1,08)=528.60$ ,  $p<0.0001$ , bundle:  $F(19,152)=11.31$ ,  $p<0.0001$ ,  
105 AFQ-types x bundle:  $F(19,152)=7.13$ ,  $p<0.0001$ ; additional 3-way rmANOVA on the 11 bilateral  
106 bundles, with AFQ-type, bundle, and hemisphere as factors revealed no effects of, or interaction with,  
107 hemisphere). Improvements from babyAFQ were also evident at the other timepoints in qualitative  
108 evaluations in individual infants. E.g., the Forceps Major was successfully identified by babyAFQ in  
109 29/29 brains, but identified by AFQ only in 13/29 brains.

110

### 111 **T<sub>1</sub> develops faster during early infancy in bundles that are less mature at birth**

112 Measurements of mean T<sub>1</sub> of the 24 bundles identified by babyAFQ at 0, 3, and 6 months  
113 reveal a substantial decrease in T<sub>1</sub> from 0 to 6 months-olds (**Fig. 2a**). Mean T<sub>1</sub> across bundles $\pm$ SE  
114 [range]: 0 months:  $2.2\pm 0.03s$  [1.86s-2.39s], 3 months:  $1.94\pm 0.03s$  [1.61s-2.18s], 6 months:  $1.64s\pm 0.02s$   
115 [1.40-1.85s]. This is a profound change, as T<sub>1</sub> decreases on average by 0.6s within just 6 months. We  
116 modeled T<sub>1</sub> development in each bundle using linear mixed models (LMMs) with age as predictor and  
117 a random intercept (estimated T<sub>1</sub> at birth) for each individual. For all bundles, LMMs revealed a  
118 negative slope, indicating that T<sub>1</sub> decreases linearly from 0-6 months. Overall, LMMs explained ~90%  
119 of the T<sub>1</sub> variance across development (adjusted  $R_s^2>0.89$ ,  $ps<0.0001$ , for details see **Supplementary**  
120 **Table 1**).

121 We next examined if there is a relationship between the rate of T<sub>1</sub> development and T<sub>1</sub> in  
122 newborns across bundles. The starts-first/finishes-first hypothesis predicts a positive relationship,  
123 whereas the catch-up hypothesis predicts a negative relationship. Results in **Fig 2b** reveal: (i) both  
124 mean T<sub>1</sub> in newborns and rate of T<sub>1</sub> development during infancy vary between bundles: e.g., the



125 cortico-spinal tract has lowest newborn  $T_1$  and the Forceps Major has the steepest slope of  $T_1$   
 126 development, and (ii) there is a significant negative correlation (adjusted  $R^2=0.35$ ,  $p=0.001$ ) between  
 127 the rate of  $T_1$  development ( $T_1$  slope) and mean  $T_1$  measured in newborns. That is, bundles that have  
 128 higher newborn  $T_1$  (associated with less myelin) have a faster rate of development, which is consistent  
 129 with the predictions of the catch-up hypothesis.

130 The catch-up hypothesis also predicts that the variability of myelination across bundles will  
 131 decrease with age, as less mature bundles develop faster. To test this, we compared the standard  
 132 deviation (SD) of  $T_1$  across bundles for newborns and 6-month-olds. Results indicate that SD of mean  
 133  $T_1$  across bundles significantly decreases (two-sample t-test:  $t(17)=7.49$ ,  $p<0.0001$ ) from newborns  
 134 ( $0.14s\pm 0.0009s$ ,  $SD\pm SE$ ) to 6-month-olds ( $0.11s\pm 0.0007s$ ), consistent with this prediction.

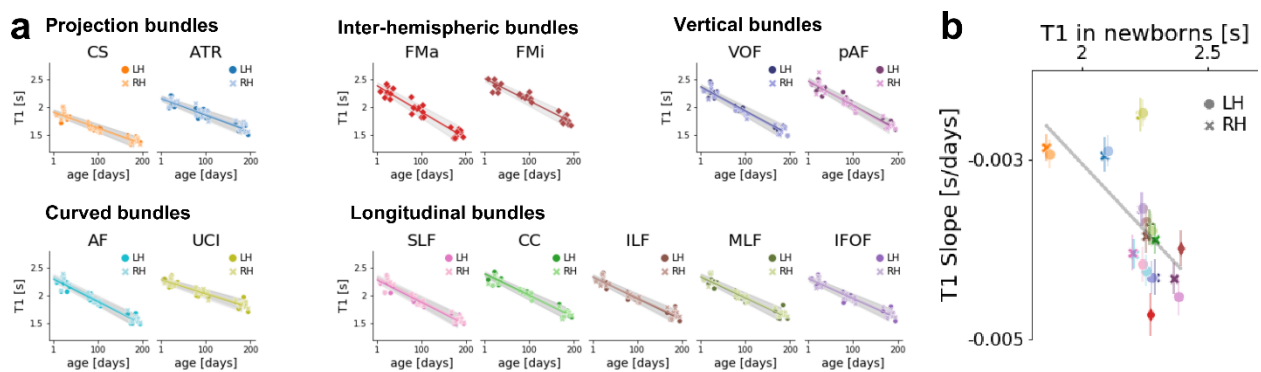

**Figure 2.  $T_1$  of white matter bundles linearly decreases from birth to 6 months of age.** **a.** Mean  $T_1$  of each bundle as a function of age in days. Each point is a participant; markers indicate hemisphere; lines indicate LMM prediction; lines for both hemispheres fall on top of each other; gray shaded regions indicate 95% confidence interval. **b.** Bundles' development rate ( $T_1$  slope) is significantly and negatively correlated with bundles'  $T_1$  in newborns, consistent with the catch-up hypothesis. *Error bars: SE. Abbreviations: LH: left hemisphere, RH: right hemisphere*

135  
 136  **$T_1$  varies across the length of a given bundle in early infancy**  
 137 Our data show that bundles that are less mature in newborns develop faster than those that  
 138 are more mature in newborns. As white matter bundles are large structures that connect cortical  
 139 regions across brain lobes, an important question is whether  $T_1$  development varies across the length  
 140 of bundles.

141 Analysis of  $T_1$  along bundles (**Fig 3**) using babyAFQ reveals three main findings: (i) Some  
142 bundles illustrate substantial variations in  $T_1$  (e.g., cortico-spinal tract), while others exhibit only  
143 modest variations (e.g., vertical occipital fasciculus). (ii) Consistent with the prior analyses, across the  
144 lengths of bundles,  $T_1$  systematically decreases from newborns (**Fig 3-dotted line**) to 3-month-olds  
145 (**Fig 3-dashed line**) to 6-months-olds (**Fig 3-solid line**). (iii) The fluctuation in  $T_1$  among nearby  
146 points along bundles decreases from newborns to 6-month-olds. That is, the variability in  $T_1$  between  
147 nonoverlapping, nearby positions along the length of each bundle (sum of squared difference (SSD)  
148 of  $T_1$  values between positions that are 10 nodes apart) significantly decreased (two-sample t-test:  
149  $t(17)=3.29$   $p=0.004$ ) from  $0.08s\pm 0.001s$  (mean SSD across bundles $\pm$ SE) in newborns to  
150  $0.07s\pm 0.0007s$  in 6-months-olds.

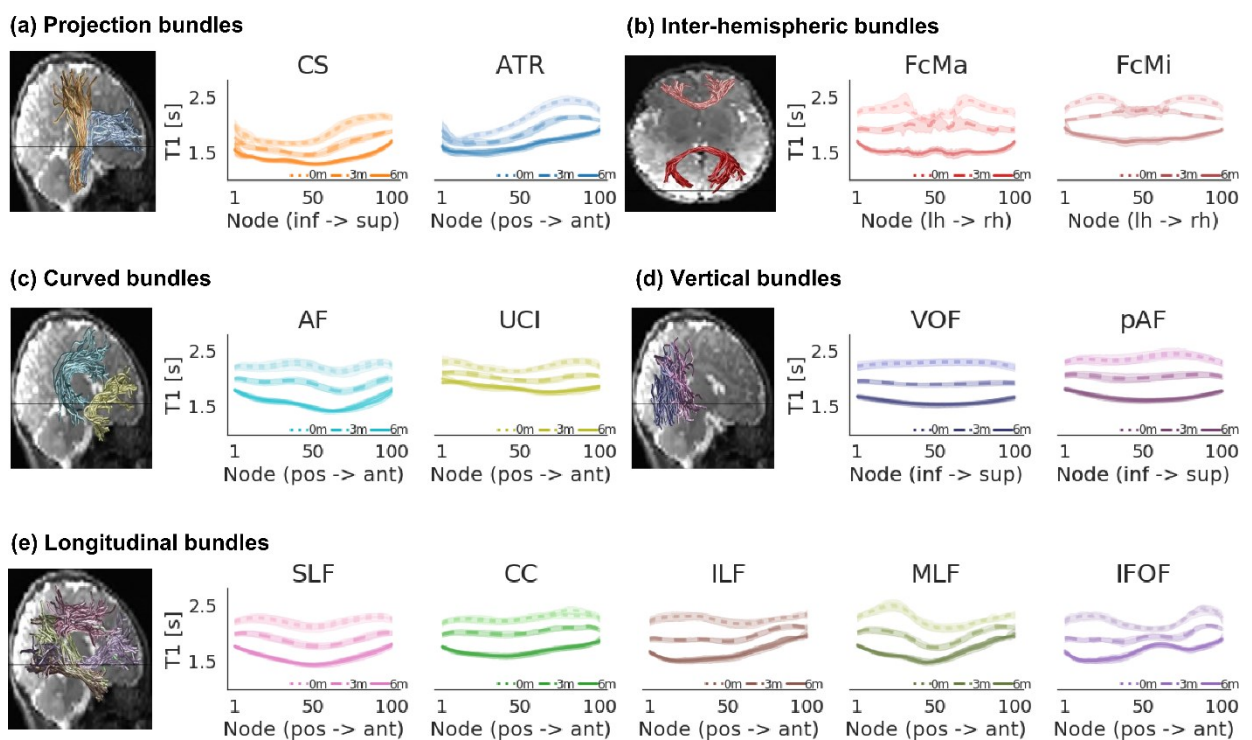

151 **Figure 3. Development of  $T_1$  along each bundle.** Mean  $T_1$  across infants is displayed in both  
152 hemispheres (lines for the two hemispheres fall on top of each other) along the length of each bundle in  
153 newborns (0m, dotted line), 3-months-olds (3m, dashed line), and 6-months-olds (6m, solid line). Shaded  
154 regions: 95% confidence intervals. Left panels show the bundles in a representative newborn.



155 **Segments of infants' bundles with less mature  $T_1$  at birth develop at a faster rate**

156 We next determined the rate of  $T_1$  development across the length of each bundle, by using  
 157 LMMs to relate  $T_1$  to age at 100 equidistant locations (nodes) (one LMM per node and bundle; random  
 158 intercepts for individuals). Examination of the rate of  $T_1$  development (**Fig 4-dashed lines**) relative  
 159 to the measured  $T_1$  in newborns (**Fig 4-solid lines**, left y-axis), reveals that (i) even as the slopes are  
 160 negative throughout, the rate of  $T_1$  decrease varies across the length of the bundles and (ii) segments  
 161 of bundles that are less mature in newborns (higher  $T_1$ ) have a steeper rate of  $T_1$  decrease (more  
 162 negative slopes) than segments that are more mature in newborns. E.g., the superior aspect of the  
 163 cortico-spinal tract has higher  $T_1$  in newborns than its inferior aspect, and correspondingly, a more  
 164 negative slope.

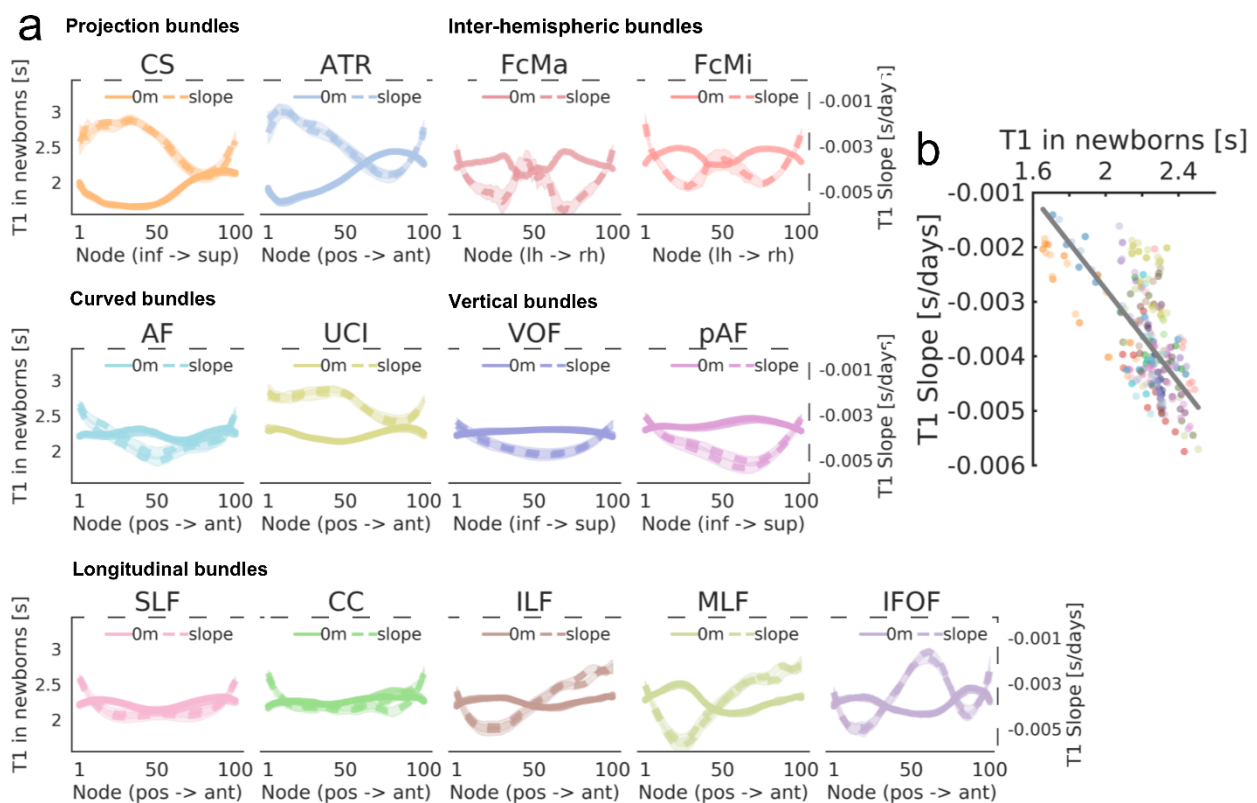

**Figure 4. Negative relationship between  $T_1$  development rate and  $T_1$  in newborns along the length of each bundle.** **a.** Each panel jointly shows measured  $T_1$  in newborns (left y axis, solid line) and the slope of  $T_1$  development (right y axis, dashed line) at each node along the bundle. Faster development (more negative slope) corresponds to lower values of dashed lines. Higher  $T_1$  in newborns correspond to higher values in solid lines. Lines from both hemispheres are presented separately but fall on top of each other. **b.** LMM relating slope of  $T_1$  development and  $T_1$  in newborns at independent locations along the length of each bundle reveals a significant negative relationship (gray line) as predicted by the catch-up hypothesis.

165 We quantified the relationship between the slope of  $T_1$  development and the measured  $T_1$  in  
166 newborns at nonoverlapping positions (every 10th node) along all bundles (LMM relating  $T_1$  slope to  
167 measured  $T_1$  in newborns; random intercepts for each bundle). This analysis reveals a significant  
168 negative relationship (**Fig 4b**, adjusted  $R^2=0.64$ ,  $p<0.0001$ ) between  $T_1$  development rate and  
169 measured  $T_1$  in newborns along the length of these bundles. Results suggest that segments of bundles  
170 that are more mature at birth develop slower than segments that are less mature at birth as predicted  
171 by the catch-up hypothesis.

172

## 173 Discussion

174 By combining a novel approach for white matter bundle delineation in individual infant brains  
175 (babyAFQ) with new longitudinal measures of quantitative  $T_1$ , we find a substantial decrease in  $T_1$   
176 across all investigated bundles during early infancy. Notably, both within and across bundles, the rate  
177 of  $T_1$  development shows a negative relationship with the initial  $T_1$  in newborns. As  $T_1$  is inversely  
178 correlated with myelination, this suggests that bundles and their segments that are less myelinated in  
179 newborns develop faster, consistent with the predictions of the catch-up hypothesis of infant myelin  
180 development.

181 The finding that less mature white matter at birth myelinates faster during infancy is important  
182 for several reasons. First, our data not only provides empirical evidence against the classic view that  
183 white matter develops in a strictly hierarchically manner from early sensory to higher-level cognitive  
184 regions<sup>2,3</sup>, but it also offers a new parsimonious explanation for the heterogenous nature of white  
185 matter development in infancy. As myelination is experience-dependent<sup>13-16</sup>, our data suggests that the  
186 new postnatal environment and experiences may produce a flurry of myelination during the first 6  
187 months of life, overtaking the earlier prenatal gradients. For example, projection bundles associated  
188 with movement receive input already *in utero* and develop slowly after birth, while bundles that connect  
189 sensory or higher order regions may only begin to receive input after birth and develop quickly  
190 thereafter. Due to this, myelination may also be fine-tuned based on each individual infant's

191 experience. Second, we further hypothesize that the resulting negative relationship between  
192 myelination at birth and the rate of myelin development is functionally relevant. Due to this, some  
193 level of myelin will arise in all bundles during early infancy, which may enable more coordinated and  
194 effective communication across the brain. Third, our data help interpret developmental trajectories of  
195 diffusion metrics in infants<sup>11,12,30,31</sup>. Specifically, diffusion metrics that develop similarly to  $T_1$  may be  
196 more closely related to myelination than metrics with a different developmental trajectory. Thus,  
197 future studies combining multiple quantitative and diffusion MRI metrics<sup>32-34</sup> may disentangle multiple  
198 aspects of white matter microstructural development including not only myelination but also fiber  
199 organization, packing, and diameter.

200 Crucially, due to the quantitative nature of  $T_1$ <sup>7-9</sup>, we can compare our measurements to other  
201 populations. E.g., in our newborn bundles,  $T_1$  varies between 1.86s-2.39s, which is lower than  $T_1$  of  
202 2.75s-3.5s observed in the white matter of preterm infants<sup>35</sup>. This observation suggests some  
203 myelination in all evaluated bundles in full-term newborns, which contrasts with classic histological  
204 studies<sup>2-5</sup> that reported perinatal myelination in only a few white matter bundles. As classic studies  
205 used qualitative visual inspection of myelin stains, our data underscore the utility of quantitative  $T_1$   
206 measurements. Our measurements also reveal that  $T_1$  in bundles of 6-months-olds ranges between  
207 1.40s-1.85s, which is higher than the 0.8s-1.2s range reported in adults<sup>36,37</sup>, suggesting that none of the  
208 investigated bundles are fully myelinated by 6 months of age. Future longitudinal investigations over  
209 a longer period are necessary to determine when these bundles reach adult-like myelination. Finally,  
210 we find that mean  $T_1$  across bundles decreases on average by 0.6s within just 6 months, which is 10  
211 times larger than the decrease of  $\sim 0.05$ s observed between 8 and 18 years of age<sup>36</sup>, which highlights  
212 the profound changes occurring in early infancy.

213 Our study has important societal implications. First,  $T_1$  values are quantitative and have units  
214 that can be numerically compared across scanners, populations, and individuals<sup>9</sup>. Thus, our  
215 measurements in typically-developing infants provide a key foundation for large-scale studies of infant  
216 brain development in typical<sup>38,39</sup> and clinical populations such as preterm infants<sup>40</sup>, infants with

217 cerebral palsy<sup>41</sup>, or fetal alcohol spectrum disorders<sup>42</sup>. Second, our methodology is translatable to  
218 clinical settings as it is performed during natural sleep. Third, we developed an automated pipeline  
219 that simultaneously provides high throughput and high precision in individual infants. This level of  
220 precision may enable early identification of developmental impairments in at-risk infants, which in  
221 turn may improve the efficacy of interventions<sup>43</sup>.

222         In conclusion, we find that during early infancy less mature white matter at birth develops  
223 faster than more mature white matter, equalizing myelination across white matter bundles. This  
224 finding offers a new parsimonious explanation of white matter development in early infancy. We  
225 hypothesize that this pattern of myelination in infancy is driven by experience and ensures that a  
226 minimal amount of myelin becomes quickly available throughout the brain, which may serve to  
227 promote efficient and coordinated communication across the brain.

228

## 229 **Methods**

### 230 **Participants**

231         16 full-term and healthy infants (7 female) were recruited to participate in this study. Three  
232 infants provided no usable data because they could not stay asleep once the MRI sequences started  
233 and hence, we report data from 13 infants (6 female) across three timepoints: newborn (N=9; age: 8-  
234 37 days), 3 months (N=10; age: 79-106 days), and 6 months (N=10; age: 167-195 days). Two  
235 participants were re-invited to complete scans for their 6-months session that could not be completed  
236 during the first try. Both rescans were performed within 7 days and participants were still within age  
237 range for the 6-months timepoint. The participant population was racially and ethnically diverse  
238 reflecting the population of the Bay Area, including two Hispanic, nine Caucasian, two Asian, and  
239 three multiracial participants. Six out of the 13 infants participated in MRI in all three timepoints (0,  
240 3, 6 months). Due to the Covid-19 pandemic and restricted research guidelines, data acquisition was  
241 halted. Consequently, the remaining infants participated in either 1 or 2 sessions.

242           Expectant mothers and their infants in our study were recruited from the San Francisco Bay  
243 Area using social media platforms. We performed a two-step screening process for expectant mothers.  
244 First, mothers were screened over the phone for eligibility based on exclusionary criteria designed to  
245 recruit a sample of typically developing infants and second, eligible expectant mothers were screened  
246 once again after giving birth. Exclusionary criteria for expectant mothers were as follows: recreational  
247 drug use during pregnancy, significant alcohol use during pregnancy (more than 3 instances of alcohol  
248 consumption per trimester; more than 1 drink per occasion), lifetime diagnosis of autism spectrum  
249 disorder or a disorder involving psychosis or mania, taking prescription medications for any of these  
250 disorders during pregnancy, written and spoken English ability insufficient to participate in the study,  
251 and learning differences that would preclude participation in the study. Exclusionary criteria for infants  
252 were: preterm birth (<37 gestational weeks), low birthweight (<5 lbs 8 oz), small height (<18 inches),  
253 any congenital, genetic, and neurological disorders, visual problems, complications during birth that  
254 involved the infant (e.g., NICU stay), history of head trauma, and contraindications for MRI (e.g.,  
255 metal implants).

256

## 257 **Data Acquisition Procedure**

258           Data collection procedure was developed in a recent study<sup>44</sup>. All included participants  
259 completed the multiple scanning protocols needed to obtain anatomical MRI, qMRI, and dMRI data.  
260 Data were acquired at two identical 3T GE Discovery MR750 Scanners (GE Healthcare) and Nova  
261 32-channel head coils (Nova Medical) located at Stanford University: (i) Center for Cognitive and  
262 Neurobiological Imaging (CNI) and (ii) Lucas Imaging Center. As infants have low weight, all imaging  
263 was done with first level SAR to ensure their safety. Study protocols for these scans were approved  
264 by the Stanford University Internal Review Board on Human Subjects Research.

265           Scanning sessions were scheduled in the evenings close in time to the infants' typical bedtime.  
266 Each session lasted between 2.5 – 5 hours including time to prepare the infant and waiting time for  
267 them to fall asleep. Upon arrival, caregivers provided written, informed consent for themselves and

268 their infant to participate in the study. Before entering the MRI suite, both caregiver and infant were  
269 checked to ensure that they were metal-free and caregivers changed the infants into MR safe cotton  
270 onesies and footed pants provided by the researchers. The infant was swaddled with a blanket with  
271 their hands to their sides to avoid their hands creating a loop. During sessions involving newborn  
272 infants, an MR safe plastic immobilizer (MedVac, [www.supertechx-ray.com](http://www.supertechx-ray.com)) was used to stabilize the  
273 infant and their head position. Once the infant was ready for scanning, the caregiver and infant entered  
274 the MR suite. The caregiver was instructed to follow their child's typical sleep routine. As the infant  
275 was falling asleep, researchers inserted soft wax earplugs into the infant's ears. Once the infant was  
276 asleep, the caregiver was instructed to gently place the infant on a makeshift cradle on the scanner  
277 bed, created by weighted bags placed at the edges of the bed to prevent any side-to-side movement.  
278 Finally, to lower sound transmission, MRI compatible neonatal Noise Attenuators  
279 ([https://newborncare.natus.com/products-services/newborn-care-products/nursery-](https://newborncare.natus.com/products-services/newborn-care-products/nursery-essentials/minimuffs-neonatal-noise-attenuators)  
280 [essentials/minimuffs-neonatal-noise-attenuators](https://newborncare.natus.com/products-services/newborn-care-products/nursery-essentials/minimuffs-neonatal-noise-attenuators)) were placed on the infant's ears and additional pads  
281 were also placed around the infant's head to stabilize head motion.

282 An experimenter stayed inside the MR suite with the infant during the entire scan. For  
283 additional monitoring of the infant's safety and lack of motion, an infrared camera was affixed to the  
284 head coil and positioned for viewing the infant's face in the scanner. The researcher operating the  
285 scanner monitored the infant via the camera feed, which allowed for the scan to be stopped  
286 immediately if the infant showed signs of waking or distress. This setup also allowed tracking the  
287 infant's motion; scans were stopped and repeated if there was excessive head motion. To ensure scan  
288 data quality, in addition to real-time monitoring of the infant's motion via an infrared camera, MR  
289 brain image quality was also assessed immediately after acquisition of each sequence and repeated if  
290 necessary.

291

292

293



## 294 **Data Acquisition Parameters and Preprocessing**

295 Anatomical MRI: T2-weighted images were acquired and used for tissue segmentations. T2-  
296 weighed image acquisition parameters: TE=124 ms; TR = 3650ms; echo train length = 120; voxel size  
297 = 0.8mm<sup>3</sup>; FOV=20.5cm; Scan time: 4 min and 5 sec.

298 We generated gray/white matter tissue segmentations of all infants and time-points and used  
299 them to optimize tractography (anatomically constrained tractography, ACT<sup>45</sup>). The T2-weighted  
300 anatomy, and a synthetic T1-weighted whole brain image generated from the SPGRs and IR-EPI  
301 scans using mrQ software (<https://github.com/mezera/mrQ>) were aligned and used for  
302 segmentations. Multiple steps were applied to generate accurate segmentations of each infant's brain  
303 at each timepoint<sup>44</sup>. (1) An initial segmentation of gray and white matter was generated from the T1-  
304 weighted brain volume using infant FreeSurfer's automatic segmentation code that expects T1-  
305 weighted input (infant-recon-all; <https://surfer.nmr.mgh.harvard.edu/fswiki/infantFS><sup>46</sup>). (2) The T2-  
306 weighted anatomical images, which have a better contrast between gray and white matter in infants,  
307 were used in an independent brain extraction toolbox (Brain Extraction and Analysis Toolbox,  
308 iBEAT, v:2.0 cloud processing, <https://ibeat.wildapricot.org/><sup>47-49</sup>) to generate another, more accurate,  
309 white and gray matter segmentation. (3) The iBEAT segmentation was manually corrected to fix  
310 segmentation errors (such as holes and handles) using ITK-SNAP (<http://www.itksnap.org/>). (4) The  
311 iBEAT segmentation was then reinstalled to FreeSurfer and the resulting segmentation in typical  
312 FreeSurfer format was used to optimize tractography.

313  
314 Quantitative MRI: Spoiled-gradient echo images (SPGRs) were used together with the  
315 Inversion-recovery EPI (IR-EPI) sequence to estimate T<sub>1</sub> relaxation time at each voxel and to generate  
316 whole-brain synthetic T<sub>1</sub>-weighted images. We acquired 4 SPGRs whole brain images with different  
317 flip angles:  $\alpha = 4^\circ, 10^\circ, 15^\circ, 20^\circ$ ; TE=3ms; TR =14ms; voxel size=1mm<sup>3</sup>; number of slices=120;  
318 FOV=22.4cm; Scan time: 4 times ~5 minutes. We also acquired multiple inversion times (TI) in the

319 IR-EPI using a slice-shuffling technique<sup>50</sup>: 20 TIs with the first TI=50ms and TI interval=150ms as  
320 well as a second IR-EPI with reverse phase encoding direction. Other acquisition parameters were:  
321 voxel size=2mm<sup>3</sup>; number of slices=60; FOV=20cm; in-plane/through-plane acceleration=1/3; Scan  
322 time=two times 1:45 min.

323 IR-EPI data were used to estimate T<sub>1</sub> relaxation time at each voxel. First, as part of the  
324 preprocessing, we performed susceptibility-induced distortion correction on the IR-EPI images using  
325 FSL's top-up and the IR-EPI acquisition with reverse phase encoding direction. We then used the  
326 distortion corrected images to fit the T<sub>1</sub> relaxation signal model using a multi-dimensional Levenberg-  
327 Marquardt algorithm<sup>51</sup>. The signal equation of T<sub>1</sub> relaxation of an inversion-recovery sequence is an  
328 exponential decay:

$$329 \quad \mathbf{S}(t) = \mathbf{a}(1 - \mathbf{b}e^{-t/T_1}),$$

330 where t is the inversion time, a is proportional to the initial magnetization of the voxel, b is  
331 the effective inversion coefficient of the voxel (for perfect inversion b=2). To work with magnitude  
332 images, we took the absolute value of the above signal equation and used it as the fitting model. The  
333 output of the algorithm is the estimated T<sub>1</sub> in each voxel.

334  
335 Diffusion MRI: We obtained dMRI data with the following parameters: multi-shell, #diffusion  
336 directions/b-value = 9/0, 30/700, 64/2000; TE = 75.7 ms; TR=2800ms; voxel size = 2mm<sup>3</sup>; number  
337 of slices=60; FOV=20cm; in-plane/through-plane acceleration = 1/3; Scan time: 5:08 min. We also  
338 acquired a short dMRI scan with reverse phase encoding direction and only 6 b=0 images (scan time  
339 0:20 min).

340 dMRI preprocessing was performed in accordance with recent work from the developing  
341 human connectome project<sup>52,53</sup>, using a combination of tools from MRtrix3<sup>54,55</sup>  
342 ([github.com/MRtrix3/mrtrix3](http://github.com/MRtrix3/mrtrix3)) and mrDiffusion (<http://github.com/vistalab/vistasoft>). We (i)  
343 denoised the data using a principal component analysis<sup>56</sup>, (ii) used FSL's top-up tool

344 (<https://fsl.fmrib.ox.ac.uk/>) and one image collected in the opposite phase-encoding direction to  
345 correct for susceptibility-induced distortions, (iii) used FSL's eddy to perform eddy current and motion  
346 correction, whereby motion correction included outlier slice detection and replacement<sup>57</sup> and (iv)  
347 performed bias correction using ANTs<sup>58</sup>. The preprocessed dMRI images were registered to the  
348 whole-brain T2-weighted anatomy using whole-brain rigid-body registration and alignment quality was  
349 checked for all images. dMRI quality assurance was also performed. Across all acquisitions, less than  
350  $5\% \pm 0.72\%$  of dMRI images were identified as outliers by FSL's eddy tool. We found no significant  
351 effect of age across the outliers (no main effect of age:  $F(2,26)=1.97$ ,  $p=0.16$ , newborn:  $1.07+0.88\%$ ;  
352 3 months:  $0.4+0.40\%$ ; 6 months:  $0.67+0.85\%$ ), suggesting that the developmental data was well  
353 controlled across all time-points.

354 Next, voxel-wise fiber orientation distributions (FODs) were calculated using constrained  
355 spherical deconvolution (CSD) in MRtrix3<sup>54</sup> (**Supplementary Data 2**). We used the Dhollander  
356 algorithm<sup>59</sup> to estimate the three-tissue response function, and we lowered the FA threshold to 0.1 to  
357 account for the generally larger FA in infant brains. We computed FODs with multi-shell multi-tissue  
358 CSD<sup>60</sup> separately for the white matter and the CSF. As in previous work<sup>52</sup>, the gray matter was not  
359 modeled separately, as white and gray matter do not have sufficiently distinct b-value dependencies to  
360 allow for a clean separation of the signals. Finally, we performed multi-tissue informed log-domain  
361 intensity normalization.

362 We used MRtrix3<sup>54</sup> to generate a whole brain white matter connectome for each subject.  
363 Tractography was optimized using the tissue segmentation from anatomical MRI (anatomically-  
364 constrained tractography, ACT<sup>45</sup>). We argue that this approach is particularly useful for infant data, as  
365 gray and white matter cannot be separated in the FODs. For each connectome, we used probabilistic  
366 fiber tracking with the following parameters: algorithm: IFOD1, step size: 0.2 mm, minimum length:  
367 4 mm, maximum length: 200 mm, FOD amplitude stopping criterion: 0.05, maximum angle:  $15^\circ$ .  
368 Seeds for tractography were randomly placed within the gray/white matter interface (from anatomical

369 tissue segmentation), which enabled us to ensure that tracts reach the gray matter. Each connectome  
370 consisted of 2 million streamlines.

371

## 372 **Bundle delineation with baby automated fiber quantification (babyAFQ)**

373 Here we developed a new toolbox (babyAFQ) for the identification of white matter bundles  
374 in individual infants, that is openly available as a novel component of AFQ<sup>26</sup>  
375 (<https://github.com/yeatmanlab/AFQ/tree/master/babyAFQ>). BabyAFQ identifies the following  
376 bundles (**Fig. 1**): anterior thalamic radiation (ATR), cortico-spinal tract (CS), posterior arcuate  
377 fasciculus (pAF), vertical occipital fasciculus (VOF), forceps major (FcMa), forceps minor (FcMi),  
378 arcuate fasciculus (AF), uncinate fasciculus (UCI), superior longitudinal fasciculus (SLF), cingulum  
379 cingulate (CC), inferior longitudinal fasciculus (ILF), inferior frontal occipital fasciculus (IFOF) and  
380 the middle longitudinal fasciculus (MLF).

381 BabyAFQ uses anatomical ROIs as waypoints for each bundle, that is, a given tract is  
382 considered a candidate for belonging to a bundle if it passes through all waypoints. The waypoint  
383 ROIs were adjusted from those commonly used in adults<sup>21</sup> to better match the head size and white  
384 matter organization of infants (**Supplementary Data 3**). Specifically, we: (i) spatially restricted some  
385 of the waypoint ROIs, (ii) introduced a third waypoint for curvy bundles, (iii) changed the waypoint  
386 ROIs for the VOF from surface ROIs to volumetric ROIs (**Supplementary Data 4**), as cortical  
387 surface reconstructions in infants are challenging to date and (iv) added way-point ROIs for the  
388 identification of the MLF, which was not included in prior AFQ versions. Critically, these waypoints  
389 were defined in a neonate infant template brain (UNC Neonatal template<sup>20</sup>) and are transformed from  
390 this template space to individual infant brain space before bundle delineation in each infant's brain.  
391 The use of an infant template brain is critical as commonly used adult templates, such as the MNI  
392 brain, are substantially larger and difficult to align to infant data. In cases where a given tract is a  
393 candidate for multiple bundles, a probabilistic atlas, which is also transformed from infant template  
394 space to individual infant brain space, is used to determine which bundle is the better match for the

395 tract. Bundles are then cleaned by removing tracts that exceed a gaussian distance of 4 from the core  
396 of the bundle.

397 Critically, babyAFQ was designed to seamlessly integrate with AFQ, so that additional tools  
398 for plotting, tract profile evaluation and statistical analysis can be applied after bundle delineation.

399

#### 400 **BabyAFQ quality assurance**

401 In order to evaluate the quality of the bundle delineation in babyAFQ, we compared the  
402 identified bundles to manually delineated “gold-standard” bundles. Manual bundle delineation was  
403 performed for the newborns in DSI Studio (<http://dsi-studio.labsolver.org/>) by 2 anatomical experts  
404 who were blinded to the results of babyAFQ. As a benchmark, we also delineated bundles with AFQ  
405 developed using adult data and compared these bundles to the manual bundles. For both babyAFQ  
406 and AFQ we quantified the spatial overlap between the automatically identified bundles and the  
407 manual bundles using the dice coefficient<sup>61</sup> (DC):  $DC = \frac{2|A \cap B|}{|A| + |B|}$ , where  $|A|$  are voxels of  
408 automatically-identified bundles,  $|B|$  are voxels of the manual bundles, and  $|A \cap B|$  is the  
409 intersection between these two sets of voxels (**Fig. 1b**). We compared dice coefficients between  
410 babyAFQ and AFQ in two rmANOVAs. First, a 2-way rmANOVA with AFQ-type and bundle as  
411 factors allowed us to evaluate the effect of AFQ type across all bundles. Second, a 3-way rmANOVA  
412 with AFQ-type, bundle and hemisphere as factors, that only included bilateral bundles, enabled us to  
413 test for hemispheric differences. Finally, we also used the dice coefficients to test if tracts identified  
414 to be part of the VOF are similar across methods – i.e., using volumetric way-point ROIs vs. surface  
415 ROIs (**Supplementary Data 4**).

416 In addition to the quantitative evaluation, we examined all bundles delineated using babyAFQ  
417 and AFQ qualitatively at all time-points (**Supplementary Data 5**), by evaluating how well they match  
418 the typical spatial extent and trajectory. We also provide an interactive 3D visualization of an example  
419 infant’s bundles (created with pyAFQ<sup>62</sup>).

## 420 **Modeling $T_1$ development**

421           After identifying all bundles with babyAFQ, we modeled their  $T_1$  development using mixed  
422 linear models (LMMs). First, we modeled mean  $T_1$  development within each bundle using LMMs with  
423 age as predictor and a random intercept (estimated  $T_1$  at birth) for each individual (**Fig 2a**). We used  
424 model comparison (likelihood ratio tests) to determine that LMMs allowing different slopes for each  
425 individual do not better explain the data compared to LMMs using a single slope across individuals.  
426 To distinguish between the starts-first/finishes-first hypothesis and the catch-up hypothesis, we then  
427 related the developmental slopes from the LMMs and the  $T_1$  in newborns across bundles (**Fig 2b**).  
428 Finally, we compared the standard deviation in  $T_1$  across bundles between newborns and 6 months-  
429 olds with 2-sample t-tests.

430           Next, we evaluated the development of  $T_1$  across the length of each bundle. For this, we  
431 divided each bundle into 100 equidistant locations (nodes) and visually inspected  $T_1$  at each time-point  
432 across these nodes (**Fig 3**). We observed that the fluctuation in  $T_1$  among nearby nodes decreased  
433 with age, and quantified this observation by comparing the sum of squared difference (SSD) between  
434 positions that are 10 nodes apart in the newborns and the 6-months-olds with 2-sample t-tests.

435           We then determined the rate of  $T_1$  development across the length of each bundle by fitting  
436 LMMs that relate  $T_1$  to age at each node (one LMM per bundle; random intercepts for each individual  
437 as above, **Fig 4a**). Finally, we evaluated the relationship between the slope of  $T_1$  development and the  
438 measured  $T_1$  in newborns at nonoverlapping positions (every 10th node) along all bundles (LMM  
439 relating  $T_1$  slope to measured  $T_1$  in newborns, random intercepts for each bundle, **Fig 4b**). We used  
440 model comparison (likelihood ratio test) to determine that a LMM allowing different slopes for each  
441 bundle does not better explain the data compared to this LMM.

442

443

444



## 445 **Data and code availability**

446           The data were analyzed using open source software, including mrDiffusion and MRtrix3<sup>54</sup>. We  
447 developed a new toolbox for automatic fiber quantification in individual infants (babyAFQ) and make  
448 it openly available (<https://github.com/yeatmanlab/AFQ/tree/babyAFQ/babyAFQ>). Code for  
449 reproducing all figures is made available in GitHub as well (<https://github.com/VPNL/CatchUp>).  
450 The data generated in this study will be made available by the corresponding author upon reasonable  
451 request.

452

## 453 **Acknowledgements**

454           The research was funded by: Wu Tsai Neurosciences Institute Big Idea Neurodevelopment  
455 Grant, R21 EY030588 grant and the Center for Mind, Brain and Behavior (CMBB, Marburg,  
456 Germany).

457           We would like to thank all participating families, as well as, KK Barrows, Amy Kang, Javier  
458 Lopez, Laura Villalobos, Nancy Lopez-Alvarez, and Lois Williams for their help with white/gray  
459 matter segmentations of infant brains. We would also like to thank Jiyeong Ha for her contributions  
460 towards data quality assurance and Caitlyn Estrada for her contribution to data collection.

461

## 462 **Author contribution**

463           MR, HK, and FRQ collected the data. MR, VN, HK and FRQ generated gray/white matter  
464 segmentations and T<sub>1</sub> maps. HW developed scanning sequences. MG and JDY developed babyAFQ  
465 and data analysis pipeline. MG, JDY and KGS analyzed data. MG and KGS wrote initial draft of the  
466 manuscript. All authors edited and improved the initial draft.

467

468

## 469 Competing Interests

470 The authors declare no competing interests.

471

## 472 References:

- 473 1. Fields, R. D. White matter in learning, cognition and psychiatric disorders. *Trends in*  
474 *Neurosciences* **31**, 361–370 (2008).
- 475 2. Flechsig, P. . Anatomie des menschlichen Gehirns und Rückenmarks aus myelogenetischer  
476 Grundlage. *JAMA J. Am. Med. Assoc.* **76**, 676 (1921).
- 477 3. Yakovlev, P. I. & Lecours, A.-R. The myelogenetic cycles of regional maturation of the brain.  
478 in *Regional Development of Brain in Early Life* 3–70 (1967).
- 479 4. Kinney, H. C., Brody, B. A., Kloman, A. S. & Gilles, F. H. Sequence of central nervous  
480 system myelination in human infancy: II. Patterns of myelination in autopsied infants. *J.*  
481 *Neuropathol. Exp. Neurol.* **47**, 217–234 (1988).
- 482 5. Gilles, F. H., Shankle, W. & Dooling, E. C. MYELINATED TRACTS: GROWTH  
483 PATTERNS. in *The Developing Human Brain* 117–183 (Elsevier, 1983). doi:10.1016/b978-0-  
484 7236-7017-9.50018-1
- 485 6. Schleicher, A., Amunts, K., Geyer, S., Morosan, P. & Zilles, K. Observer-independent  
486 method for microstructural parcellation of cerebral cortex: A quantitative approach to  
487 cytoarchitectonics. *Neuroimage* **9**, 165–177 (1999).
- 488 7. Deoni, S. C. L. *et al.* Mapping infant brain myelination with magnetic resonance imaging. *J.*  
489 *Neurosci.* **31**, 784–791 (2011).
- 490 8. Deoni, S. C. L., Dean, D. C., O’Muircheartaigh, J., Dirks, H. & Jerskey, B. A. Investigating  
491 white matter development in infancy and early childhood using myelin water fraction and  
492 relaxation time mapping. *Neuroimage* **63**, 1038–1053 (2012).
- 493 9. Mezer, A. *et al.* Quantifying the local tissue volume and composition in individual brains with  
494 magnetic resonance imaging. *Nat. Med.* **19**, 1667–1672 (2013).
- 495 10. Weiskopf, N., Mohammadi, S., Lutti, A. & Callaghan, M. F. Advances in MRI-based  
496 computational neuroanatomy: From morphometry to in-vivo histology. *Curr. Opin. Neurol.* **28**,  
497 313–322 (2015).
- 498 11. Qiu, A., Mori, S. & Miller, M. I. Diffusion tensor imaging for understanding brain  
499 development in early life. *Annu. Rev. Psychol.* **66**, 853–876 (2015).
- 500 12. Dubois, J. *et al.* Exploring the Early Organization and Maturation of Linguistic Pathways in  
501 the Human Infant Brain. *Cereb. Cortex* **26**, 2283–2298 (2016).
- 502 13. Zatorre, R. J., Fields, R. D. & Johansen-Berg, H. Plasticity in gray and white: Neuroimaging  
503 changes in brain structure during learning. *Nat. Neurosci.* **15**, 528–536 (2012).
- 504 14. Gibson, E. M. *et al.* Neuronal activity promotes oligodendrogenesis and adaptive myelination  
505 in the mammalian brain. *Science (80-. ).* **344**, (2014).
- 506 15. Hughes, E. G., Orthmann-Murphy, J. L., Langseth, A. J. & Bergles, D. E. Myelin remodeling

- 507 through experience-dependent oligodendrogenesis in the adult somatosensory cortex. *Nat.*  
508 *Neurosci.* **21**, 696–706 (2018).
- 509 16. Makinodan, M., Rosen, K. M., Ito, S. & Corfas, G. A critical period for social experience-  
510 dependent oligodendrocyte maturation and myelination. *Science (80-. )*. **337**, 1357–1360 (2012).
- 511 17. Stüber, C. *et al.* Myelin and iron concentration in the human brain: A quantitative study of  
512 MRI contrast. *Neuroimage* **93**, 95–106 (2014).
- 513 18. Knickmeyer, R. C. *et al.* A structural MRI study of human brain development from birth to 2  
514 years. *J. Neurosci.* **28**, 12176–12182 (2008).
- 515 19. Ouyang, M., Dubois, J., Yu, Q., Mukherjee, P. & Huang, H. Delineation of early brain  
516 development from fetuses to infants with diffusion MRI and beyond. *NeuroImage* **185**, 836–  
517 850 (2019).
- 518 20. Shi, F. *et al.* Infant Brain Atlases from Neonates to 1- and 2-Year-Olds. *PLoS One* **6**, e18746  
519 (2011).
- 520 21. Wakana, S. *et al.* Reproducibility of quantitative tractography methods applied to cerebral  
521 white matter. *Neuroimage* **36**, 630–644 (2007).
- 522 22. Weiner, K. S., Yeatman, J. D. & Wandell, B. A. The posterior arcuate fasciculus and the  
523 vertical occipital fasciculus. *Cortex* (2016). doi:10.1016/j.cortex.2016.03.012
- 524 23. Takemura, H. *et al.* A Major Human White Matter Pathway Between Dorsal and Ventral  
525 Visual Cortex. *Cereb. Cortex* **26**, 2205–2214 (2016).
- 526 24. Yeatman, J. D. *et al.* The vertical occipital fasciculus: A century of controversy resolved by in  
527 vivo measurements. *Proc. Natl. Acad. Sci.* **111**, E5214–E5223 (2014).
- 528 25. Wang, Y. *et al.* Rethinking the role of the middle longitudinal fascicle in language and auditory  
529 pathways. *Cereb. Cortex* **23**, 2347–2356 (2013).
- 530 26. Yeatman, J. D., Dougherty, R. F., Myall, N. J., Wandell, B. A. & Feldman, H. M. Tract  
531 Profiles of White Matter Properties: Automating Fiber-Tract Quantification. *PLoS One* **7**,  
532 (2012).
- 533 27. Jiang, H. *et al.* Early diagnosis of spastic cerebral palsy in infants with periventricular white  
534 matter injury using diffusion tensor imaging. *Am. J. Neuroradiol.* **40**, 162–168 (2019).
- 535 28. Langer, N. *et al.* White Matter Alterations in Infants at Risk for Developmental Dyslexia.  
536 *Cereb. Cortex* **27**, 1027–1036 (2017).
- 537 29. Travis, K. E., Adams, J. N., Ben-Shachar, M. & Feldman, H. M. Decreased and increased  
538 anisotropy along major cerebral white matter tracts in preterm children and adolescents. *PLoS*  
539 *One* **10**, e0142860 (2015).
- 540 30. Yu, Q. *et al.* Differential White Matter Maturation from Birth to 8 Years of Age. *Cereb. Cortex*  
541 **30**, 2673–2689 (2020).
- 542 31. Partridge, S. C. *et al.* Diffusion tensor imaging: Serial quantitation of white matter tract  
543 maturity in premature newborns. *Neuroimage* **22**, 1302–1314 (2004).
- 544 32. Sadeghi, N. *et al.* Regional characterization of longitudinal DT-MRI to study white matter  
545 maturation of the early developing brain. *Neuroimage* **68**, 236–247 (2013).
- 546 33. Oishi, K. *et al.* Multi-contrast human neonatal brain atlas: Application to normal neonate  
547 development analysis. *Neuroimage* **56**, 8–20 (2011).
- 548 34. Dubois, J. *et al.* MRI of the Neonatal Brain: A Review of Methodological Challenges and

- 549 Neuroscientific Advances. *Journal of Magnetic Resonance Imaging* *jmri*.27192 (2020).  
550 doi:10.1002/jmri.27192
- 551 35. Schneider, J. *et al.* Evolution of T1 relaxation, ADC, and fractional anisotropy during early  
552 brain maturation: A serial imaging study on preterm infants. *Am. J. Neuroradiol.* **37**, 155–162  
553 (2016).
- 554 36. Yeatman, J. D., Wandell, B. A. & Mezer, A. A. Lifespan maturation and degeneration of  
555 human brain white matter. *Nat. Commun.* **5**, 4932 (2014).
- 556 37. Grotheer, M., Zhen, Z., Lerma-Usabiaga, G. & Grill-Spector, K. Separate lanes for adding  
557 and reading in the white matter highways of the human brain. *Nat. Commun.* **10**, 420216  
558 (2019).
- 559 38. Howell, B. R. *et al.* The UNC/UMN Baby Connectome Project (BCP): An overview of the  
560 study design and protocol development. *NeuroImage* **185**, 891–905 (2019).
- 561 39. O’Muircheartaigh, J. *et al.* Modelling brain development to detect white matter injury in term  
562 and preterm born neonates. *Brain* **143**, 467–479 (2020).
- 563 40. Dubner, S. E., Rose, J., Bruckert, L., Feldman, H. M. & Travis, K. E. Neonatal white matter  
564 tract microstructure and 2-year language outcomes after preterm birth. *NeuroImage Clin.* **28**,  
565 102446 (2020).
- 566 41. Parikh, N. A., Hershey, A. & Altaye, M. Early Detection of Cerebral Palsy Using  
567 Sensorimotor Tract Biomarkers in Very Preterm Infants. *Pediatr. Neurol.* **98**, 53–60 (2019).
- 568 42. Ghazi Sherbaf, F., Aarabi, M. H., Hosein Yazdi, M. & Haghshomar, M. White matter  
569 microstructure in fetal alcohol spectrum disorders: A systematic review of diffusion tensor  
570 imaging studies. *Human Brain Mapping* **40**, 1017–1036 (2019).
- 571 43. Herskind, A., Greisen, G. & Nielsen, J. B. Early identification and intervention in cerebral  
572 palsy. *Dev. Med. Child Neurol.* **57**, 29–36 (2015).
- 573 44. Rosenke, M. *et al.* Myelin contributes to microstructural growth in human sensory cortex  
574 during early infancy. *bioRxiv* 2021.03.16.435703 (2021). doi:10.1101/2021.03.16.435703
- 575 45. Smith, R. E., Tournier, J. D., Calamante, F. & Connelly, A. Anatomically-constrained  
576 tractography: Improved diffusion MRI streamlines tractography through effective use of  
577 anatomical information. *Neuroimage* **62**, 1924–1938 (2012).
- 578 46. Zöllei, L., Iglesias, J. E., Ou, Y., Grant, P. E. & Fischl, B. Infant FreeSurfer: An automated  
579 segmentation and surface extraction pipeline for T1-weighted neuroimaging data of infants  
580 0–2 years. *Neuroimage* **218**, 116946 (2020).
- 581 47. Li, G. *et al.* Construction of 4D high-definition cortical surface atlases of infants: Methods  
582 and applications. *Med. Image Anal.* **25**, 22–36 (2015).
- 583 48. Li, G. *et al.* Measuring the dynamic longitudinal cortex development in infants by  
584 reconstruction of temporally consistent cortical surfaces. *Neuroimage* **90**, 266–279 (2014).
- 585 49. Wang, L. *et al.* Volume-based analysis of 6-month-old infant brain MRI for autism biomarker  
586 identification and early diagnosis. in *Lecture Notes in Computer Science (including subseries Lecture*  
587 *Notes in Artificial Intelligence and Lecture Notes in Bioinformatics)* **11072 LNCS**, 411–419 (Springer  
588 Verlag, 2018).
- 589 50. Wu H, Dougherty RF, Kerr AB, Zhu K, Middione MJ, M. A. Fast T1 mapping using slice-  
590 shuffled Simultaneous Multi-Slice inversion recovery EPI. *21st Annu. Meet. Organ. Hum. Brain*  
591 *Mapp.* (2015).

- 592 51. Moré, J. J. The Levenberg-Marquardt algorithm: Implementation and theory. in 105–116  
593 (Springer, Berlin, Heidelberg, 1978). doi:10.1007/bfb0067700
- 594 52. Pietsch, M. *et al.* A framework for multi-component analysis of diffusion MRI data over the  
595 neonatal period. *Neuroimage* **186**, 321–337 (2019).
- 596 53. Bastiani, M. *et al.* Automated processing pipeline for neonatal diffusion MRI in the  
597 developing Human Connectome Project. *Neuroimage* **185**, 750–763 (2019).
- 598 54. Tournier, J. D. *et al.* MRtrix3: A fast, flexible and open software framework for medical image  
599 processing and visualisation. *NeuroImage* **202**, 116137 (2019).
- 600 55. Tournier, J. D., Calamante, F. & Connelly, A. MRtrix: Diffusion tractography in crossing  
601 fiber regions. *Int. J. Imaging Syst. Technol.* **22**, 53–66 (2012).
- 602 56. Veraart, J. *et al.* Denoising of diffusion MRI using random matrix theory. *Neuroimage* **142**,  
603 394–406 (2016).
- 604 57. Andersson, J. L. R., Graham, M. S., Zsoldos, E. & Sotiropoulos, S. N. Incorporating outlier  
605 detection and replacement into a non-parametric framework for movement and distortion  
606 correction of diffusion MR images. *Neuroimage* **141**, 556–572 (2016).
- 607 58. Tustison, N. J. *et al.* N4ITK: Improved N3 bias correction. *IEEE Trans. Med. Imaging* **29**,  
608 1310–1320 (2010).
- 609 59. Dhollander, T., Raffelt, D. & Connelly, A. Unsupervised 3-tissue response function  
610 estimation from single-shell or multi-shell diffusion MR data without a co-registered T1  
611 image. in *ISMRM Workshop on Breaking the Barriers of Diffusion MRI 5* (2016).
- 612 60. Jeurissen, B., Tournier, J. D., Dhollander, T., Connelly, A. & Sijbers, J. Multi-tissue  
613 constrained spherical deconvolution for improved analysis of multi-shell diffusion MRI data.  
614 *Neuroimage* **103**, 411–426 (2014).
- 615 61. Dice, L. R. Measures of the Amount of Ecologic Association Between Species. *Ecology* **26**,  
616 297–302 (1945).
- 617 62. Kruper, J. *et al.* Evaluating the reliability of human brain white matter tractometry. *bioRxiv*  
618 2021.02.24.432740 (2021). doi:10.1101/2021.02.24.432740
- 619
- 620
